# Supplementary material
Source: MDPI journal article supplement (https://www.mdpi.com/2504-5377/4/1/5)
Supplement: s1 [file s1]

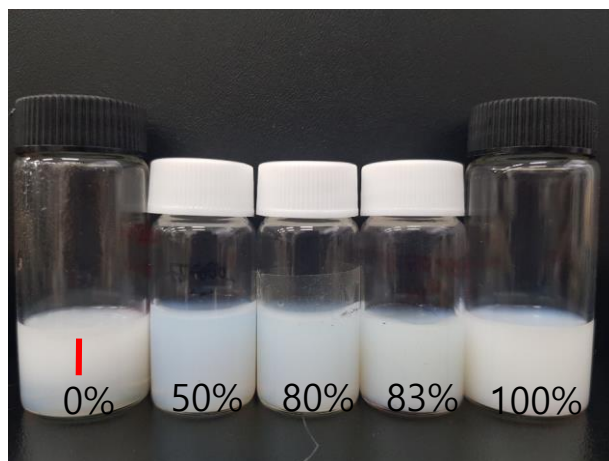

**Figure S1.** Images of the limonene nanoemulsion formed by various ratio of limonene and soybean oil: (a) 0% soybean oil, (b) 50% soybean oil, (c) 80% soybean oil, (d) 83% soybean oil and (e) 100% soybean oil. Red line indicates the phase separation in the sample.

**Table S1.** Limonene nanoemulsion size and polydispersity index (PDI) of number of pass and soybean oil content experiments.

| Soybean<br>oil<br>content<br>(%) | 0 pass               |           | 1 pass               |           | 3 pass               |           | 5 pass               |           |
|----------------------------------|----------------------|-----------|----------------------|-----------|----------------------|-----------|----------------------|-----------|
|                                  | Droplet Size<br>(nm) | PDI       |
| <b>0</b>                         | 152.80±3.51          | 0.33±0.03 | 152.70±7.29          | 0.52±0.05 | 143.65±1.20          | 0.54±0.01 | 125.70±3.15          | 0.53±0.01 |
| <b>50</b>                        | 393.80±16.28         | 0.31±0.11 | 111.43±1.35          | 0.24±0.01 | 56.39±0.15           | 0.19±0.01 | 47.26±0.18           | 0.18±0.01 |
| <b>80</b>                        | 327.80±8.27          | 0.43±0.01 | 123.93±1.02          | 0.23±0.02 | 68.75±0.17           | 0.22±0.01 | 55.53±0.19           | 0.20±0.01 |
| <b>83</b>                        | 603.00±17.83         | 0.51±0.04 | 138.30±0.25          | 0.24±0.01 | 85.89±0.53           | 0.23±0.02 | 71.08±0.87           | 0.22±0.01 |
| <b>100</b>                       | 481.60±12.10         | 0.35±0.14 | 150.90±1.91          | 0.27±0.01 | 108.90±1.31          | 0.24±0.01 | 91.20±1.60           | 0.22±0.01 |

**Table S2.** Time-based observation of nanoemulsion average droplet size of 0% soybean oil sample.

| Nanoemulsion Storage Time (days) | Droplet Average Diameter (nm) |
|----------------------------------|-------------------------------|
| 0                                | 125.70±5.00                   |
| 7                                | 158.80±6.85                   |
| 14                               | 195.80±5.03                   |

**Table S3.** Viscosity of the materials used in this study.

| Materials   | $\eta$ (25°C) (mPa.s) | $\eta_D/\eta_C$ <sup>a)</sup> |
|-------------|-----------------------|-------------------------------|
| DI Water    | 0.94                  | —                             |
| Soybean Oil | 64.90                 | 69.04                         |
| Limonene    | 0.59                  | 0.63                          |

a)  $\eta_D/\eta_C$ : viscosity ratio between dispersed phase and continuous phase. (Dispersed phase = soybean oil and limonene, continuous phase = DI water)

**Table S4.** Limonene nanoemulsion size and PDI of various synthesis method experiment.

| Processing Method              | Before Processing |           | After Processing  |           |
|--------------------------------|-------------------|-----------|-------------------|-----------|
|                                | Droplet Size (nm) | PDI       | Droplet Size (nm) | PDI       |
| <b>Ultrasonic<sup>a)</sup></b> | 392.73±6.40       | 0.49±0.01 | 327.30±9.31       | 0.45±0.01 |
| <b>HSH<sup>b)</sup></b>        | N/A               | N/A       | 178.5±0.05        | 0.34±0.02 |
| <b>HPH<sup>c)</sup></b>        | 390.85±7.21       | 0.47±0.10 | 77.30±1.01        | 0.23±0.01 |
| <b>HSH + HPH<sup>d)</sup></b>  | 327.80±8.27       | 0.51±0.04 | 55.53±0.19        | 0.20±0.01 |

a) Ultrasonic was conducted at high frequency (40 kHz)

b) HSH was conducted by mixing coarse emulsion directly at 12,000 rpm for 30 min.

c) HPH was conducted directly without HSH at 1000 bar for 5 passes

d) HSH was conducted first for 5 min at 12,000 rpm and continued by HPH at 1000 bar for 5 passes.
